# Supplementary material for: ABA-activated nanomolar Ca2+-CPK signalling controls root cap cycle plasticity and stress adaptation
Source: Research Square preprint supplement (doi:10.21203/rs.3.rs-3929094/v1), 2024-02-14
Supplement: Supplementary file 1 [file 1f777e923c906dae766942e1.pdf]

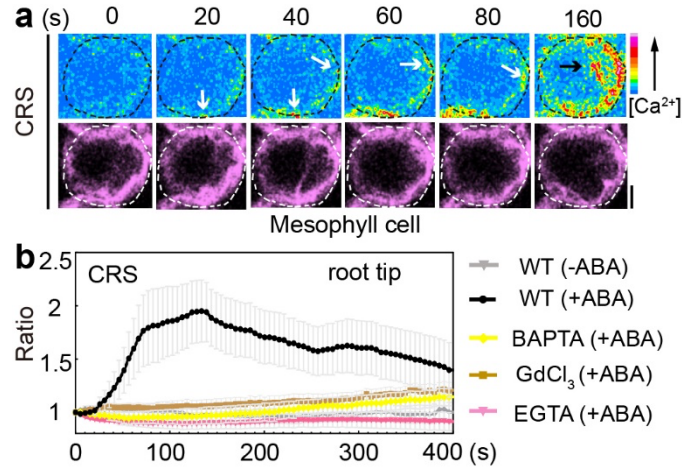

**Extended Data Fig. 6 | ABA initiates a calcium signal from an extracellular source. a**, Time-lapse images of ABA-induced Ca<sup>2+</sup> signals near nanodomains of the plasma membrane in mesophyll cells of 7-day-old transgenic CRS plants. Black or white dotted circles outline the cell. White arrows indicate elevated Ca<sup>2+</sup> signals. **b**, Ca<sup>2+</sup> channel blocker (GdCl<sub>3</sub>) or chelators (BAPTA and EGTA) abolished ABA-triggered Ca<sup>2+</sup> changes in Arabidopsis root tips (Extended Data Fig. 1 and Fig. 3). Error bars denote  $\pm$ s.e.m., n=8. Ratio, relative fluorescence ratio of GCaMP6s to dTomato. ABA, 10  $\mu$ M. Scale bar, 10  $\mu$ m. All results were conducted in at least three biological repeats with similar results.
