# Supplementary material for: ABA-activated nanomolar Ca2+-CPK signalling controls root cap cycle plasticity and stress adaptation
Source: Research Square preprint supplement (doi:10.21203/rs.3.rs-3929094/v1), 2024-02-14
Supplement: Supplementary file 2 [file 3e522f8ce8d757bd92d36040.pdf]

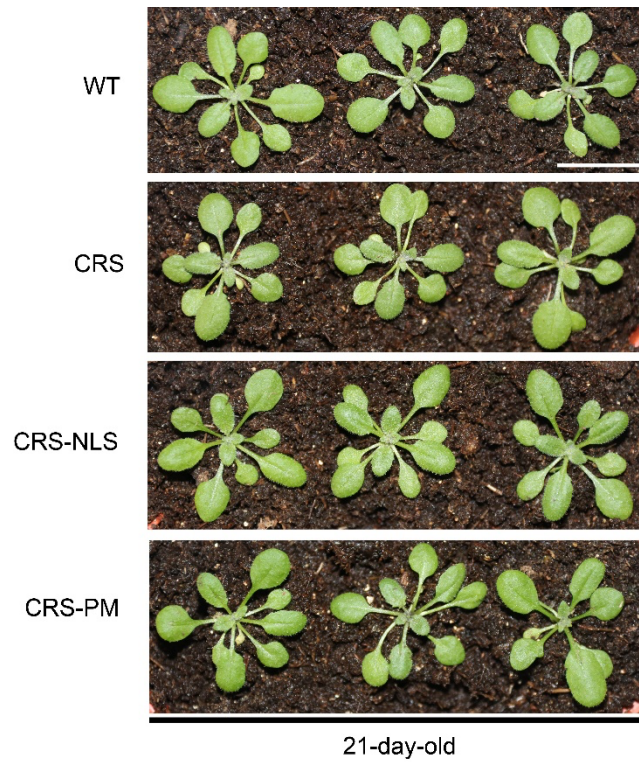

**Extended Data Fig. 3 | The CRS variants have no obvious growth defect phenotype.** CRS, CRS-NLS, CRS-PM, and WT were grown in soil for 21 days. Scale bars, 1 cm.
