# Supplementary material for: ABA-activated nanomolar Ca2+-CPK signalling controls root cap cycle plasticity and stress adaptation
Source: Research Square preprint supplement (doi:10.21203/rs.3.rs-3929094/v1), 2024-02-14
Supplement: Supplementary file 3 [file 5b08930865dcba7579e83a0f.pdf]

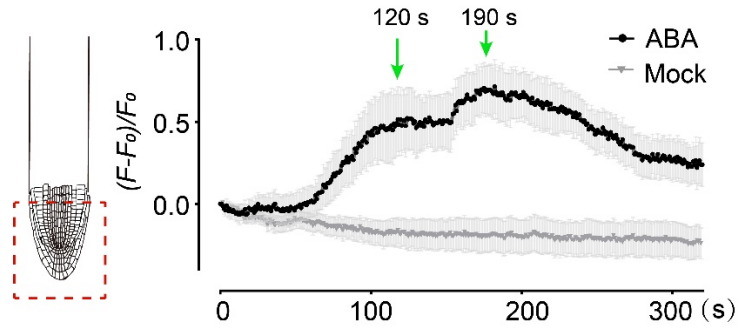

**Extended Data Fig. 1 | GCaMP6 detects ABA-induced  $\text{Ca}^{2+}$  wave in the root.** Fluorescence signals of GCaMP6s stimulated by ABA in 7-day-old plant root tip.  $(F-F_0)/F_0$ , relative fluorescence intensity. The red dotted box on the left indicates the area where the  $\text{Ca}^{2+}$  signal was detected. Instead of  $\text{Ca}^{2+}$  oscillations in guard cells, dual peaks (green arrow) were visible in the ABA-induced  $\text{Ca}^{2+}$  wave in the root tip. ABA, 10  $\mu\text{M}$ . Error bars denote  $\pm\text{s.e.m.}$ ,  $n=7$ . All results were conducted in at least three biological repeats with similar results.
