# Supplementary material for: ABA-activated nanomolar Ca2+-CPK signalling controls root cap cycle plasticity and stress adaptation
Source: Research Square preprint supplement (doi:10.21203/rs.3.rs-3929094/v1), 2024-02-14
Supplement: Supplementary file 4 [file 88fc86a1bbca67be2254eef3.pdf]

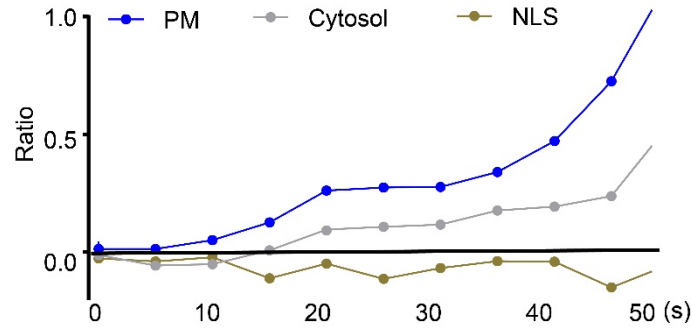

**Extended Data Fig. 5 | Differential ABA-triggered subcellular  $\text{Ca}^{2+}$  dynamics within 50 s.**

$\text{Ca}^{2+}$  signals of CRS-PM, CRS, CRS-NLS within 50 s in response to ABA in the epidermal cell of the root meristem zone in 7-day-old transgenic CRS plants. The signal result is subtracted from the mock control presented in Fig. 3b-d. CRS-PM detected the ABA-induced  $\text{Ca}^{2+}$  wave first, but the nuclear  $\text{Ca}^{2+}$  oscillation revealed by CRS-NLS did not commence until 100 s. (Fig. 3d).
