# Supplementary material for: ABA-activated nanomolar Ca2+-CPK signalling controls root cap cycle plasticity and stress adaptation
Source: Research Square preprint supplement (doi:10.21203/rs.3.rs-3929094/v1), 2024-02-14
Supplement: Supplementary file 6 [file baedeeab5caa438fda4e2ffe.pdf]

|             | WT Mock |       |       | WT NaCl |       |       | P value |
|-------------|---------|-------|-------|---------|-------|-------|---------|
| <i>FEZ</i>  | 0.765   | 1.271 | 0.964 | 0.081   | 0.141 | 0.089 | 0.0038  |
| <i>SMB</i>  | 0.989   | 1.071 | 0.94  | 0.281   | 0.291 | 0.226 | 0.0001  |
| <i>BRN2</i> | 0.801   | 1.221 | 0.978 | 0.202   | 0.388 | 0.251 | 0.0058  |
| <i>CEL5</i> | 1.012   | 0.855 | 1.133 | 0.242   | 0.238 | 0.161 | 0.0007  |
| <i>XTH5</i> | 1.078   | 0.809 | 1.113 | 0.201   | 0.209 | 0.121 | 0.0012  |
| <i>PE11</i> | 1.178   | 0.761 | 1.061 | 0.303   | 0.279 | 0.294 | 0.0047  |
| <i>RNS3</i> | 0.899   | 1.111 | 0.99  | 0.303   | 0.231 | 0.156 | 0.0005  |
| <i>MC9</i>  | 1.012   | 0.981 | 1.007 | 0.327   | 0.432 | 0.531 | 0.0007  |
| <i>KIN1</i> | 1.322   | 0.881 | 0.797 | 4.111   | 6.332 | 4.377 | 0.0054  |

**Extended Data Fig. 8 | RT-qPCR analysis of the root cap cycle genes in response to salt.** The analysis was conducted on 5-day-old wild-type root tips in response to NaCl treatment (200 mM, 2 h). The gene expression levels were normalized to the expression of *UBQ10* in each sample. The gene expression level without salt treatment was valued as 1 in WT. The ratio of each marker gene expression after salt treatment was determined. The triplate sample data are presented. The average gene expression ratio from triplicate samples was calculated and is presented in Fig. 6d. The statistical P-value was analyzed by comparing the results between Mock and salt treatment.
