# Supplementary material for: ABA-activated nanomolar Ca2+-CPK signalling controls root cap cycle plasticity and stress adaptation
Source: Research Square preprint supplement (doi:10.21203/rs.3.rs-3929094/v1), 2024-02-14
Supplement: Supplementary file 7 [file d77b9c283c7bfeaa176a1c7f.pdf]

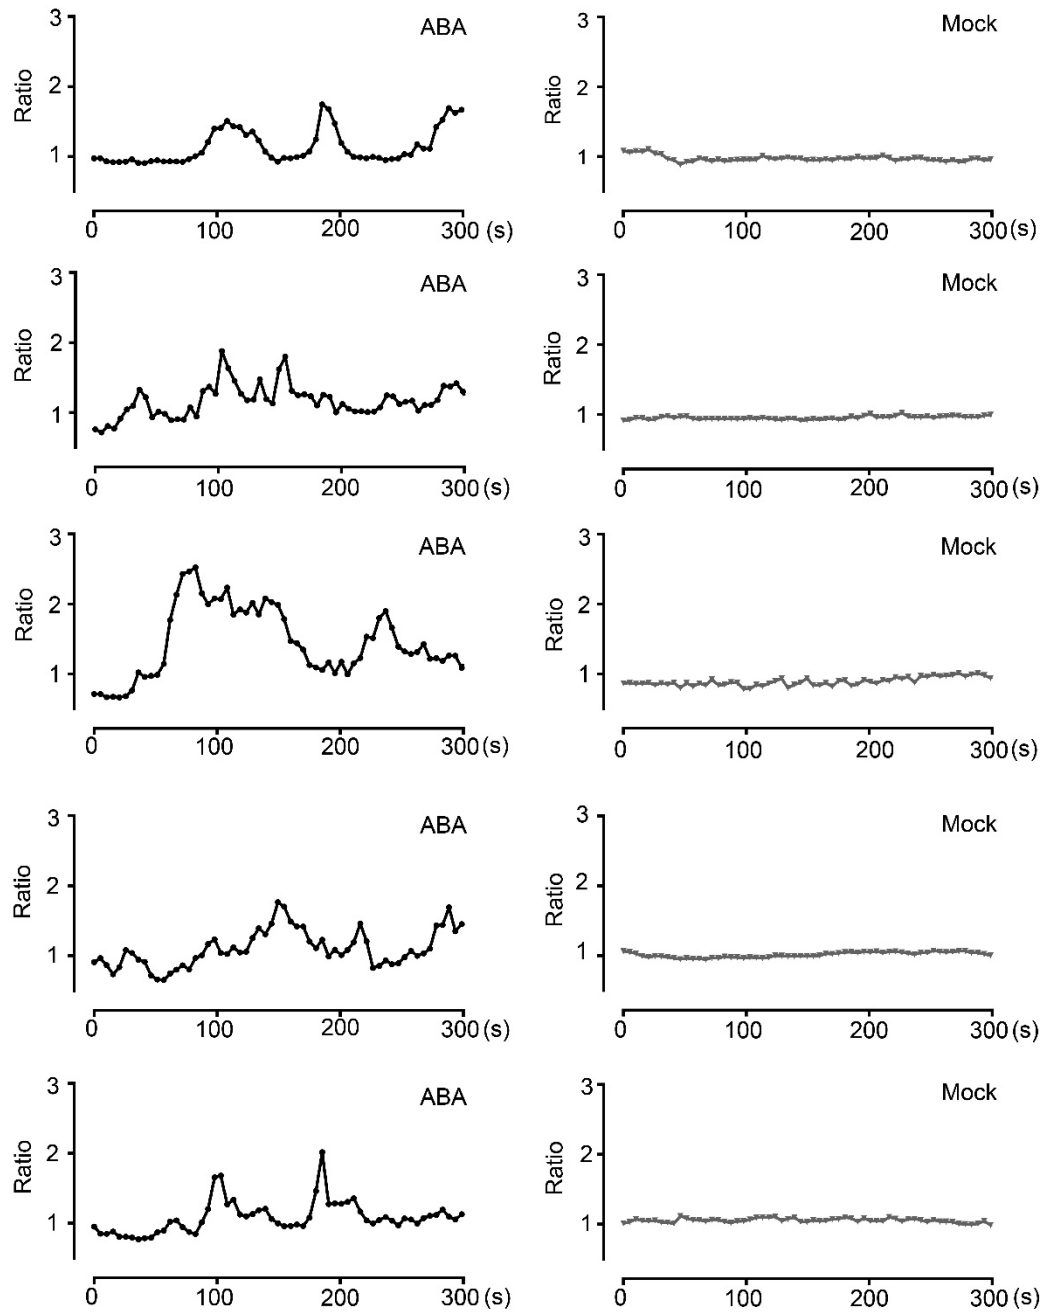

**Extended Data Fig. 4 | ABA triggers nuclear  $\text{Ca}^{2+}$  oscillation.**

Five independent repeats of  $\text{Ca}^{2+}$  signals of CRS-NLS stimulated by ABA or mock treatment in the nucleus of the epidermal cells in the root meristem of 7-day-old transgenic plants. Ratio, relative fluorescence ratio of GCaMP6s to dTomato. ABA, 10  $\mu\text{M}$ . Left, ABA. Right, Mock.
