# Supplementary material for: ABA-activated nanomolar Ca2+-CPK signalling controls root cap cycle plasticity and stress adaptation
Source: Research Square preprint supplement (doi:10.21203/rs.3.rs-3929094/v1), 2024-02-14
Supplement: Supplementary file 8 [file dfc96a10c7aeb460959651e0.pdf]

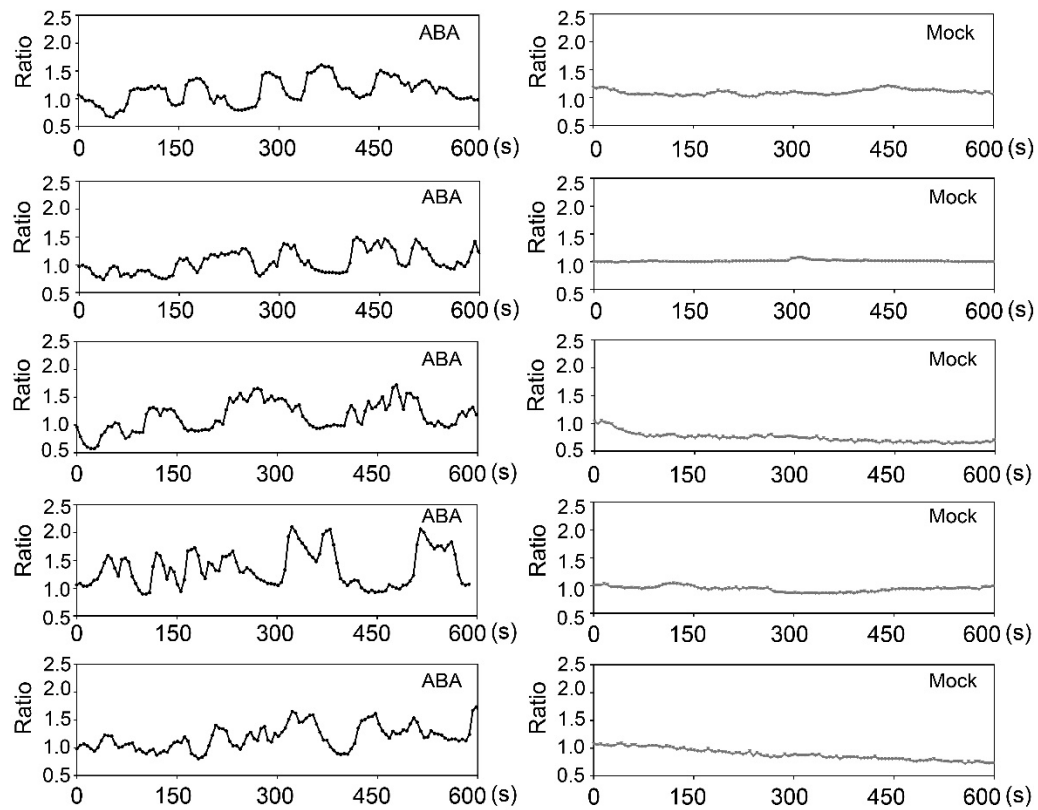

**Extended Data Fig. 2 | ABA triggers  $\text{Ca}^{2+}$  oscillation in the guard cells.** Five independent repeats of  $\text{Ca}^{2+}$  signals of CRS stimulated by ABA or mock treatment in guard cells. Ratio, relative fluorescence ratio of GCaMP6s to dTomato.  $\text{Ca}^{2+}$  oscillations were stimulated by ABA. ABA, 10  $\mu\text{M}$ . Left, ABA. Right, Mock.
